# Supplementary material for: Ubiquitination contributes to the regulation of GDP-mannose pyrophosphorylase B activity
Source: Frontiers journal article supplement (doi:10.3389/fnmol.2024.1375297), 2024-06-24

Figure 1 A, B

**A**

FLAG-GMPPB  
His<sub>6</sub>-Ubi

| input |   |   | NiNTA-PD |   |   |
|-------|---|---|----------|---|---|
| +     | - | + | +        | - | + |
| -     | + | + | -        | + | + |

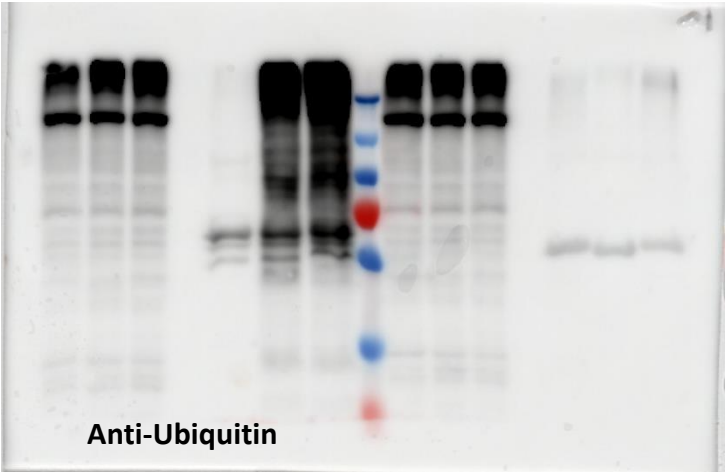

**B**

FLAG-GMPPB  
HA-Ubi

| input |   |   | FLAG-IP |   |   |
|-------|---|---|---------|---|---|
| +     | - | + | +       | - | + |
| -     | + | + | -       | + | + |

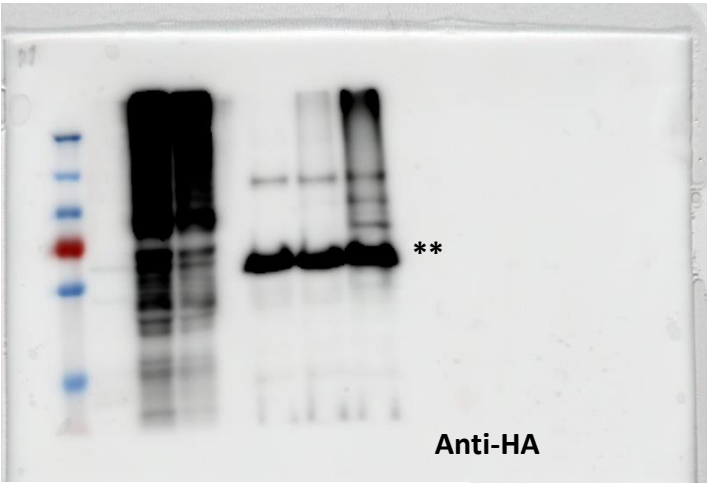

**A**

| input |   |   | FLAG-IP |   |   |
|-------|---|---|---------|---|---|
| +     | - | + | +       | - | + |
| -     | + | + | -       | + | + |

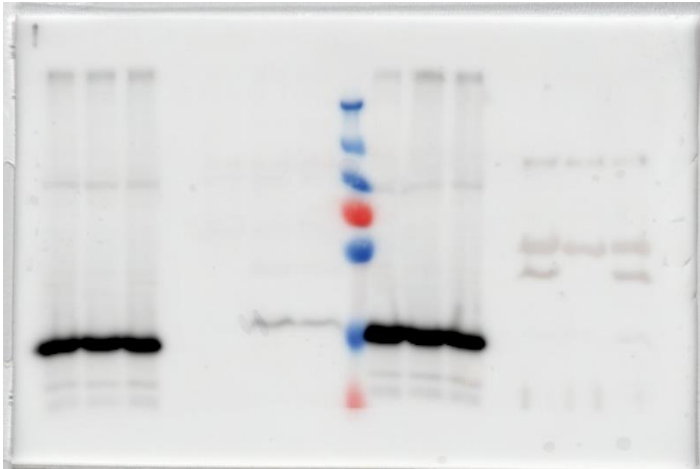

**B**

| input |   |   | FLAG-IP |   |   |
|-------|---|---|---------|---|---|
| +     | - | + | +       | - | + |
| -     | + | + | -       | + | + |

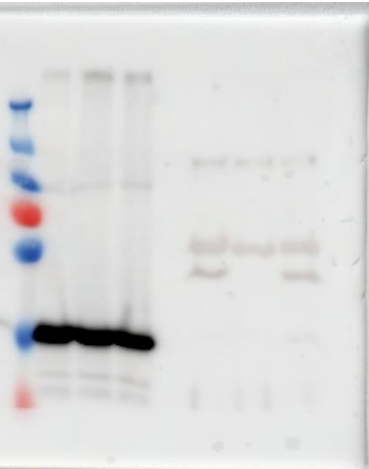

**A**

FLAG-GMPPB  
His<sub>6</sub>-Ubi

| input |   |   | NiNTA-PD |   |   |
|-------|---|---|----------|---|---|
| +     | - | + | +        | - | + |
| -     | + | + | -        | + | + |

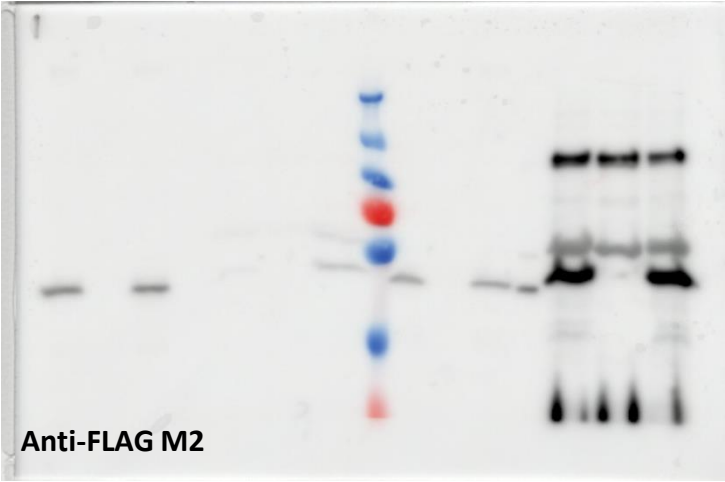

**B**

FLAG-GMPPB  
HA-Ubi

| input |   |   | FLAG-IP |   |   |
|-------|---|---|---------|---|---|
| +     | - | + | +       | - | + |
| -     | + | + | -       | + | + |

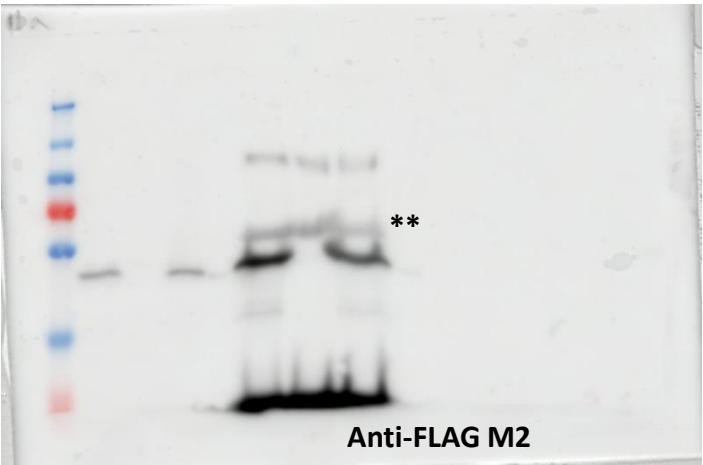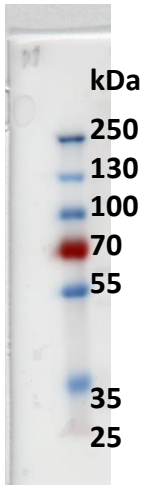

\*\* heavy chain of the precipitating antibody

Figure 1 C

C

|                            | NiNTA-PD |   |   |   |   |   |   |   |   |   |
|----------------------------|----------|---|---|---|---|---|---|---|---|---|
| FLAG-GMPPB                 | +        | - | - | - | - | - | + | + | + | + |
| His <sub>6</sub> -Ubi WT   | -        | + | - | - | - | - | + | - | - | - |
| His <sub>6</sub> -Ubi K0   | -        | - | + | - | - | - | - | + | - | - |
| His <sub>6</sub> -Ubi K63R | -        | - | - | + | - | - | - | - | + | - |
| His <sub>6</sub> -Ubi K48R | -        | - | - | - | + | - | - | - | - | + |
| His <sub>6</sub> -Ubi K29R | -        | - | - | - | - | + | - | - | - | + |

|   | NiNTA-PD |   |   |   |   |   |   |   |   |   |
|---|----------|---|---|---|---|---|---|---|---|---|
| + | -        | - | - | - | - | - | + | + | + | + |
| - | +        | - | - | - | - | - | + | - | - | - |
| - | -        | + | - | - | - | - | - | + | - | - |
| - | -        | - | + | - | - | - | - | + | - | - |
| - | -        | - | - | + | - | - | - | - | + | - |
| - | -        | - | - | - | + | - | - | - | - | + |

|   | input |   |   |   |   |   |   |   |   |   |
|---|-------|---|---|---|---|---|---|---|---|---|
| + | -     | - | - | - | - | + | + | + | + | + |
| - | +     | - | - | - | - | + | - | - | - | - |
| - | -     | + | - | - | - | - | + | - | - | - |
| - | -     | - | + | - | - | - | - | + | - | - |
| - | -     | - | - | + | - | - | - | - | + | - |
| - | -     | - | - | - | + | - | - | - | - | + |

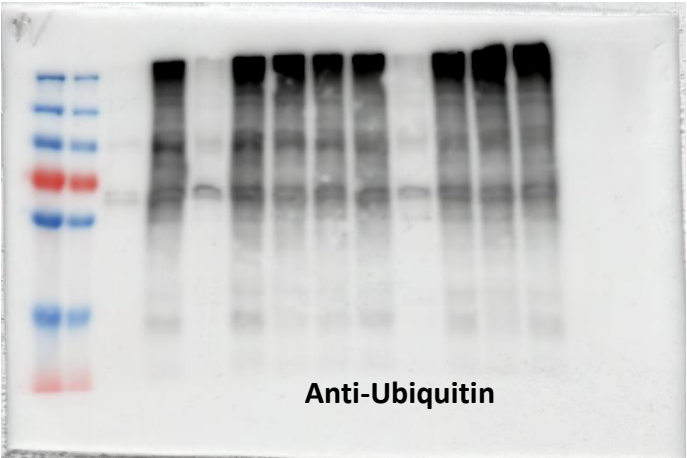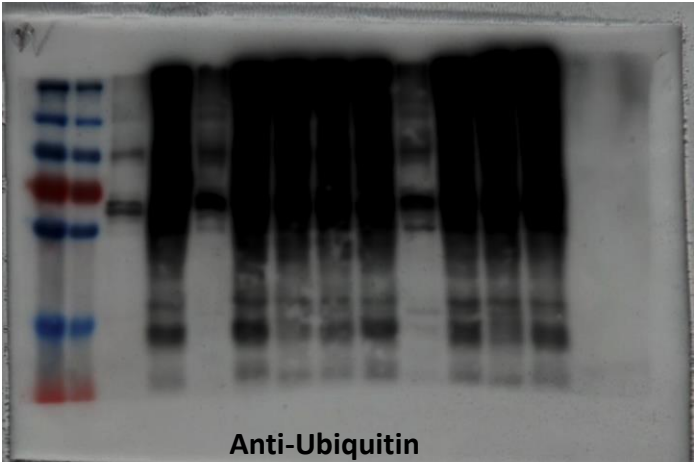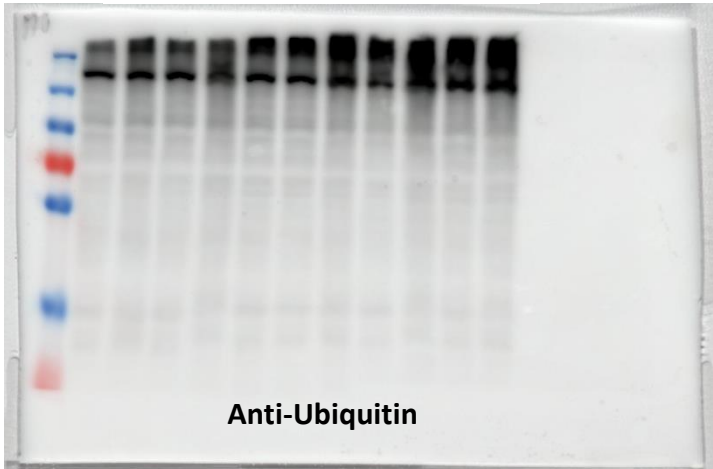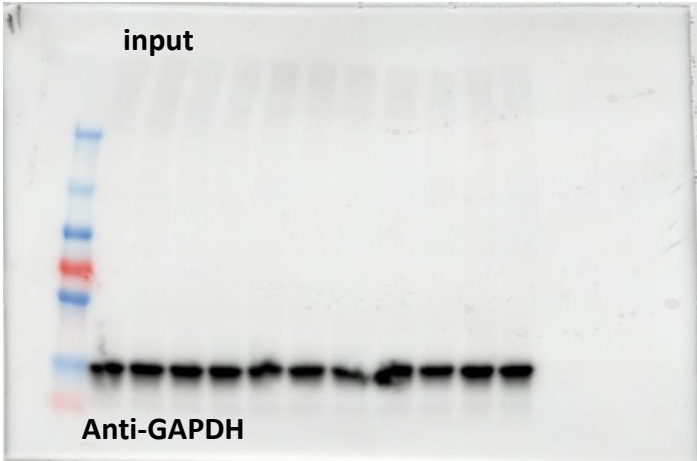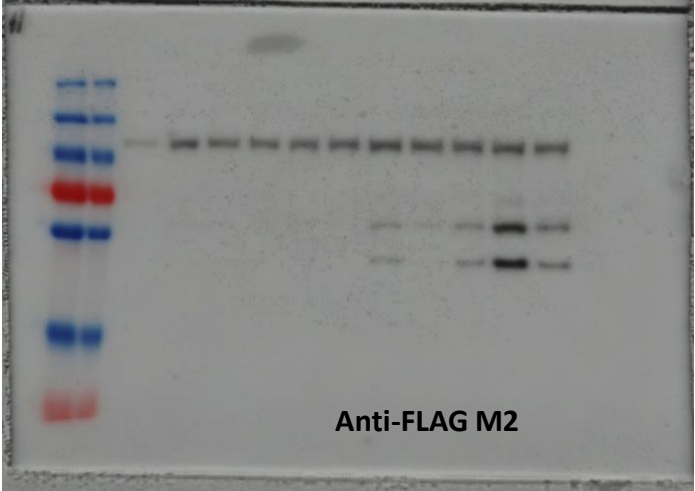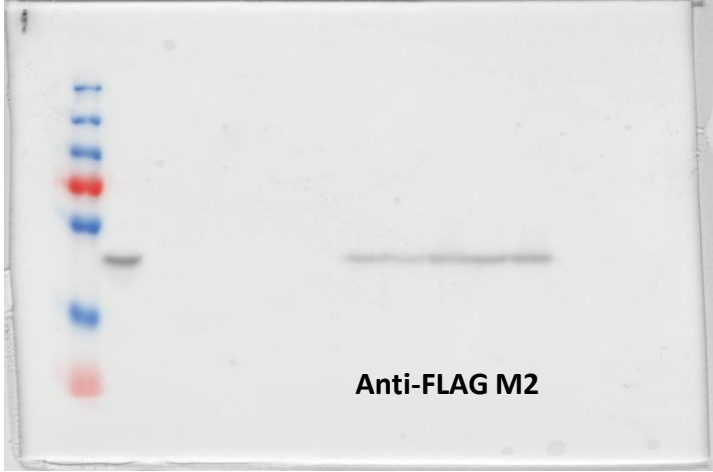

Figure 2

|                          |          |   |   |   |   |   |   |   |   |   |   |   |   |   |
|--------------------------|----------|---|---|---|---|---|---|---|---|---|---|---|---|---|
|                          | NiNTA-PD |   |   |   |   |   |   |   |   |   |   |   |   |   |
| FLAG-GMPPB WT            | +        | - | - | - | - | - | - | + | - | - | - | - | - | - |
| FLAG-GMPPB D27H          | -        | + | - | - | - | - | - | - | + | - | - | - | - | - |
| FLAG-GMPPB P103L         | -        | - | + | - | - | - | - | - | - | + | - | - | - | - |
| FLAG-GMPPB R287Q         | -        | - | - | + | - | - | - | - | - | - | + | - | - | - |
| FLAG-GMPPB D334N         | -        | - | - | - | + | - | - | - | - | - | - | + | - | - |
| FLAG-GMPPB 3KR           | -        | - | - | - | - | + | - | - | - | - | - | - | - | + |
| His <sub>6</sub> -Ubi WT | -        | - | - | - | - | - | + | + | + | + | + | + | + | + |

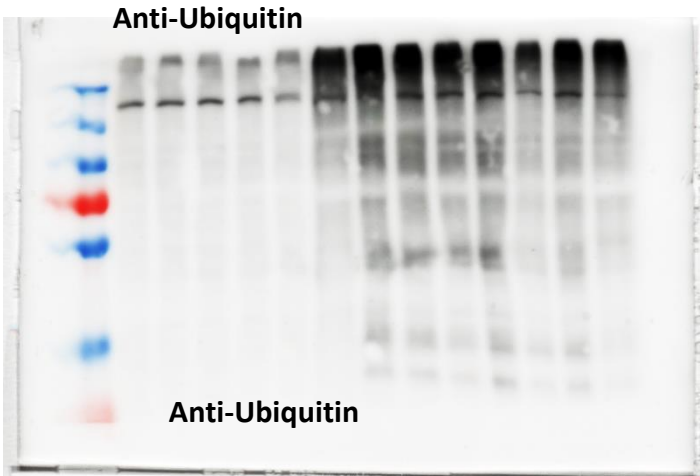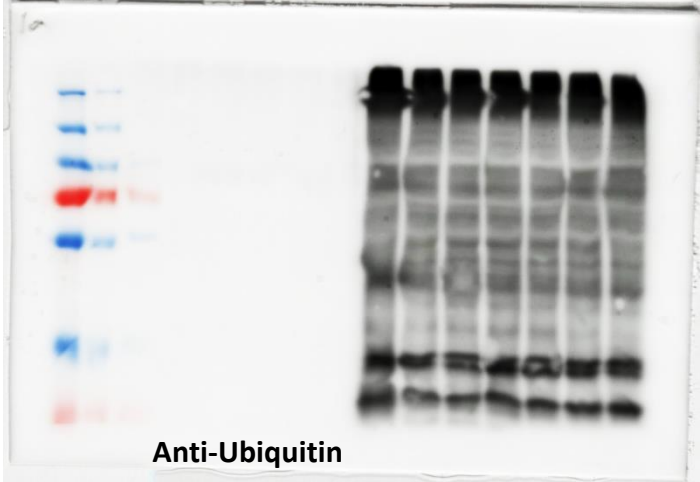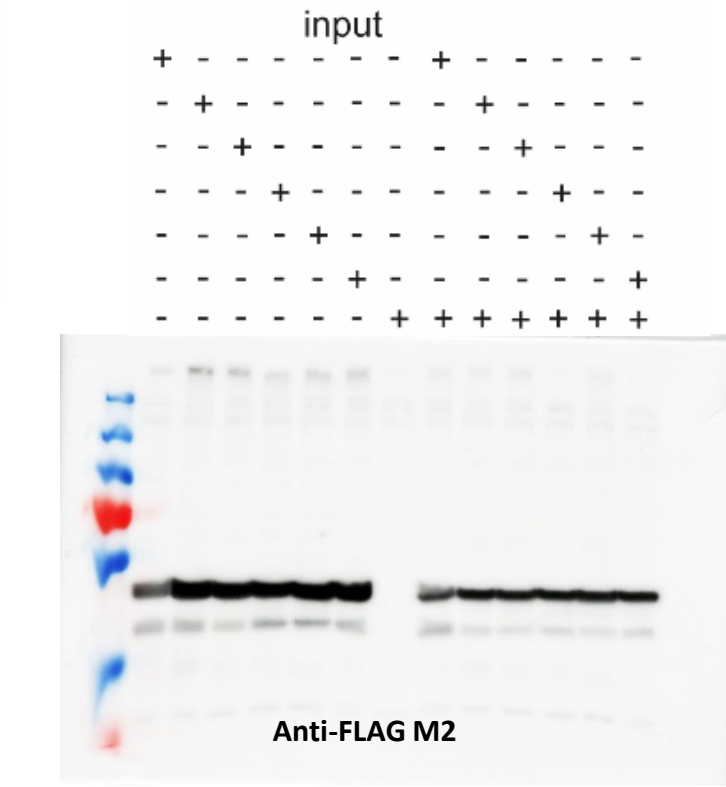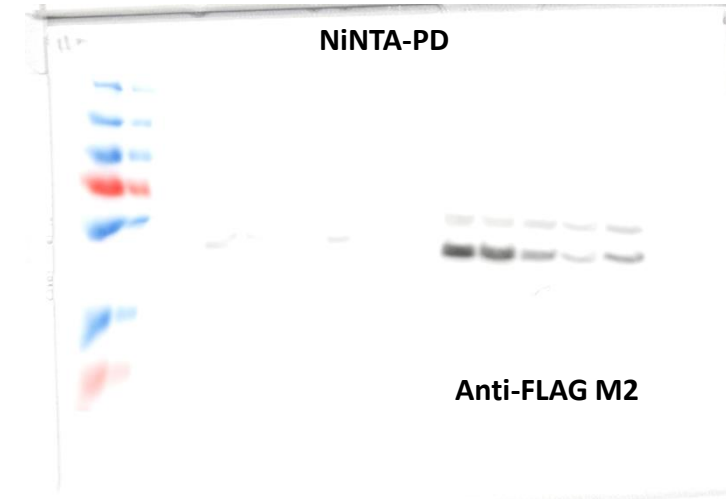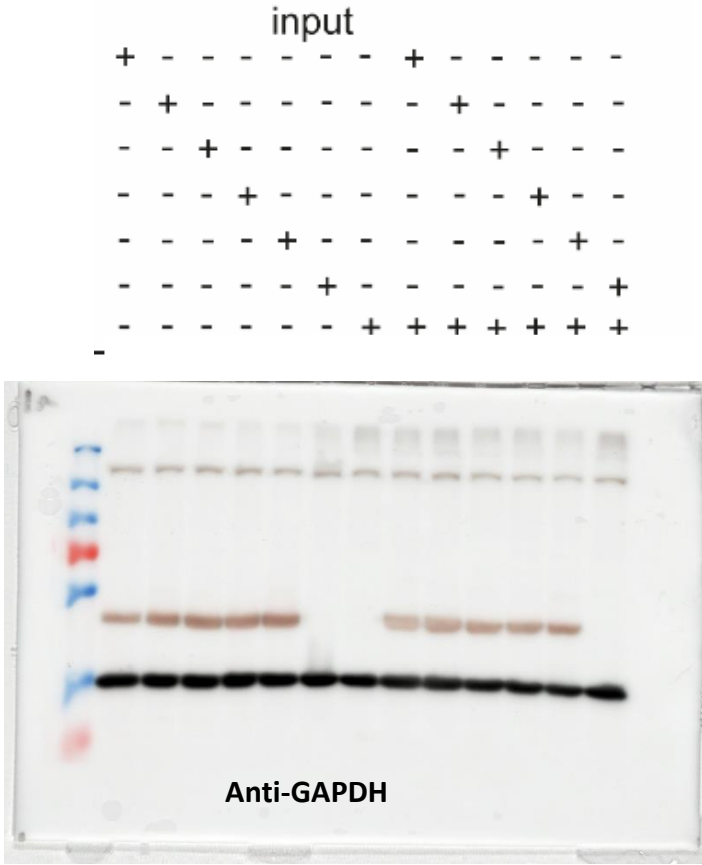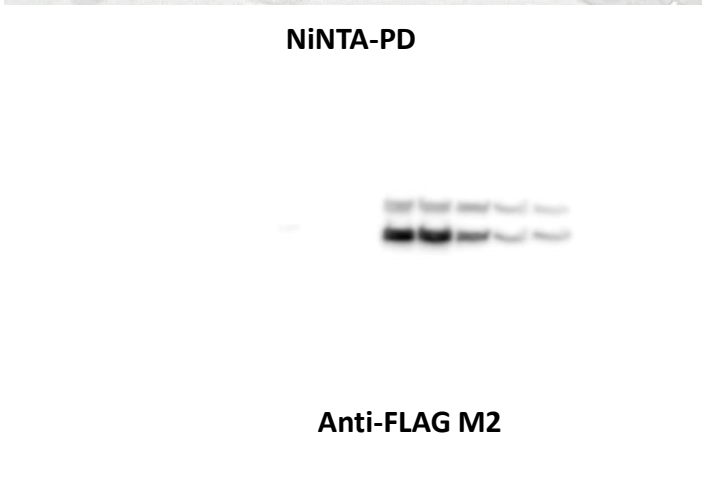

Figure 3 A

**A**

|               |   |       |   |
|---------------|---|-------|---|
| FLAG-GMPPB WT | + | HA-IP | + |
| HA-TRIM67 WT  | - | -     | + |

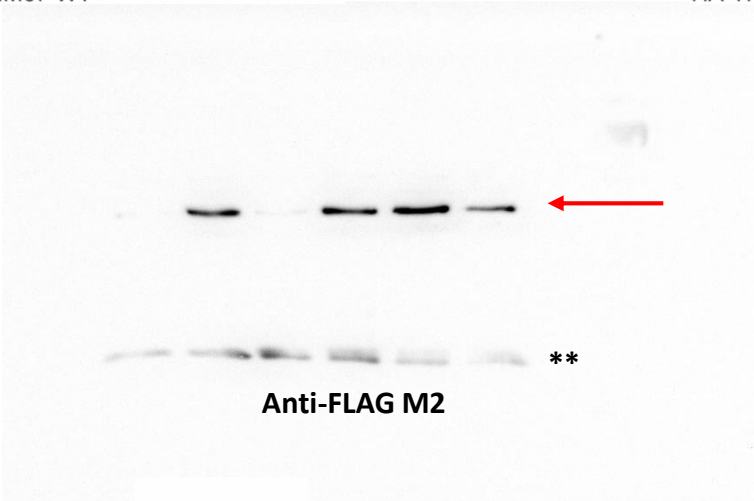

**A**

|               |   |       |   |
|---------------|---|-------|---|
| FLAG-GMPPB WT | + | HA-IP | + |
| HA-TRIM67 WT  | - | -     | + |

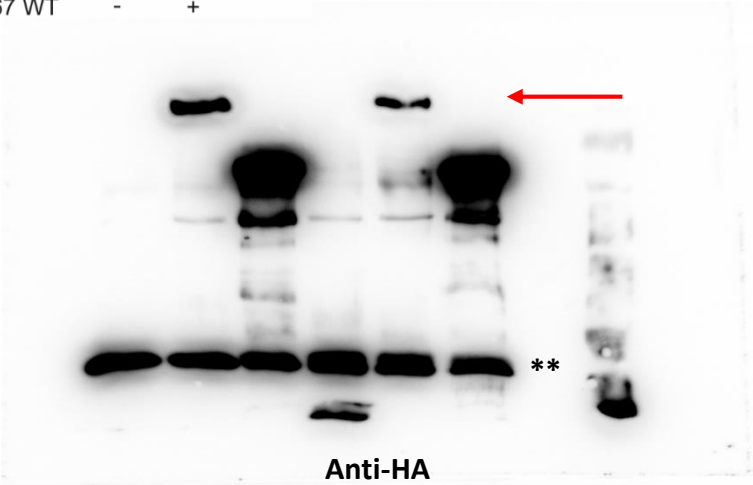

**\*\* light chain of the precipitating antibody**

|               |   |       |   |
|---------------|---|-------|---|
| FLAG-GMPPB WT | + | input | + |
| HA-TRIM67 WT  | - | -     | + |

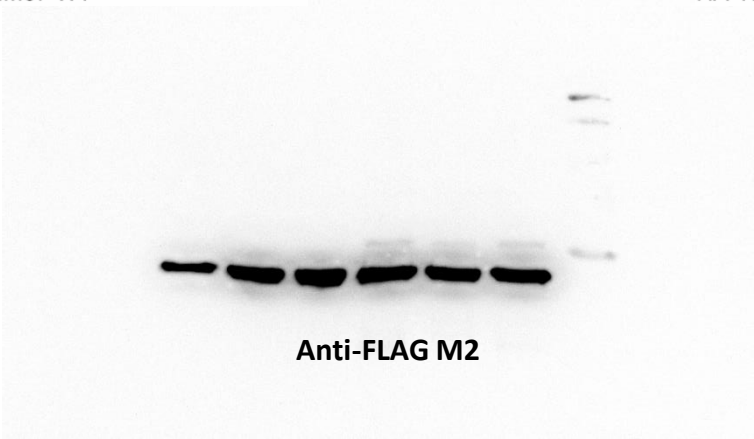

|               |   |       |   |
|---------------|---|-------|---|
| FLAG-GMPPB WT | + | input | + |
| HA-TRIM67 WT  | - | -     | + |

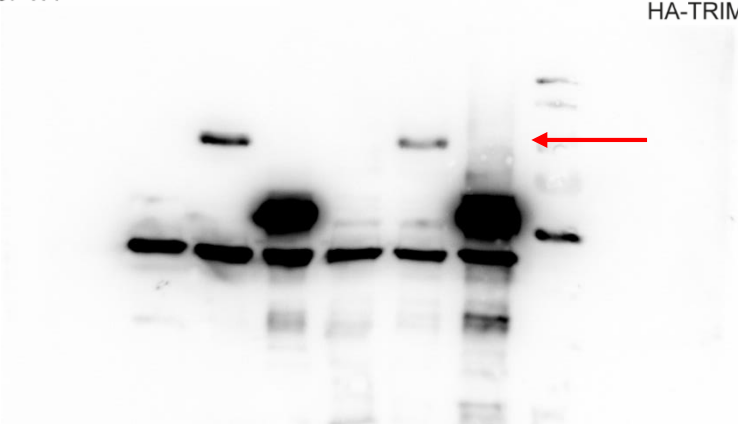

|               |   |       |   |
|---------------|---|-------|---|
| FLAG-GMPPB WT | + | input | + |
| HA-TRIM67 WT  | - | -     | + |

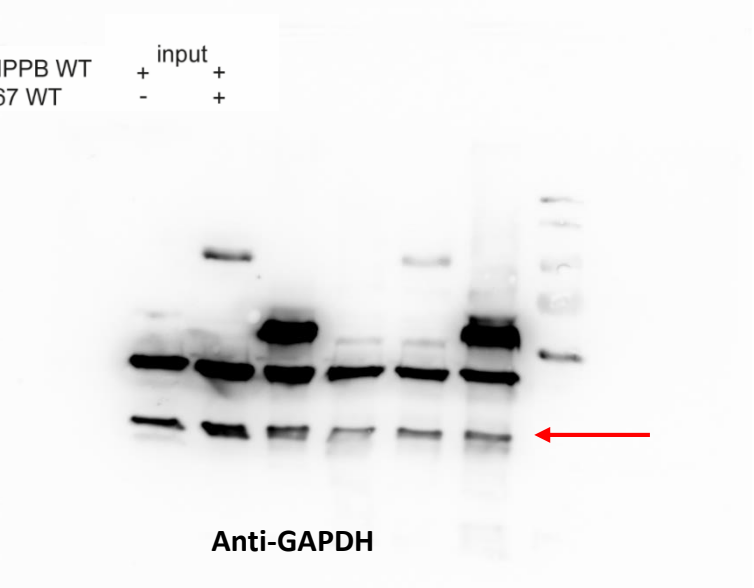

 Indicates correct band

Figure 3 B

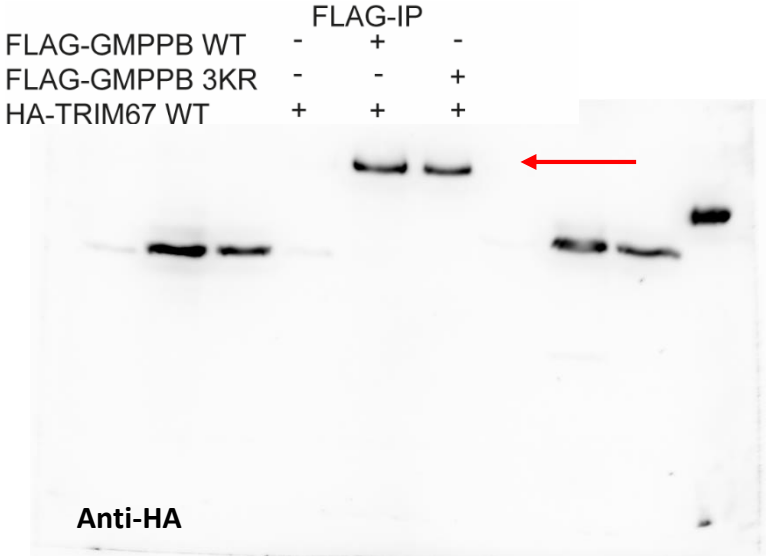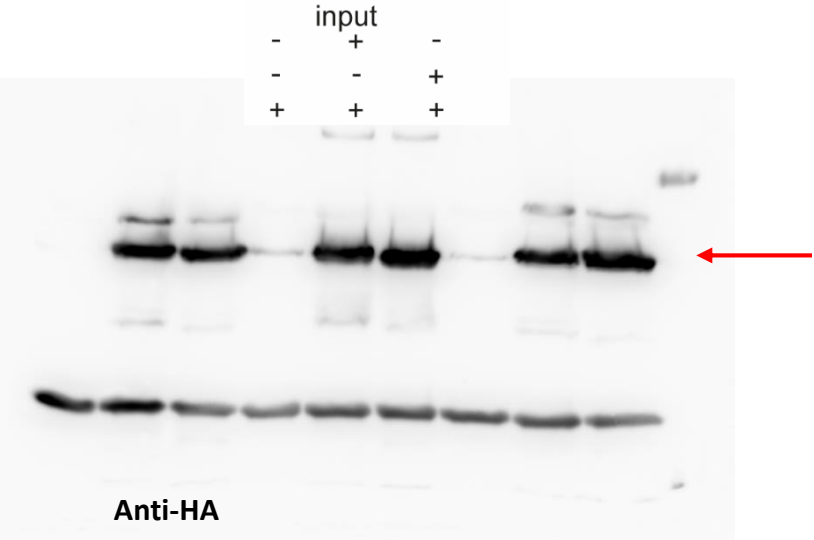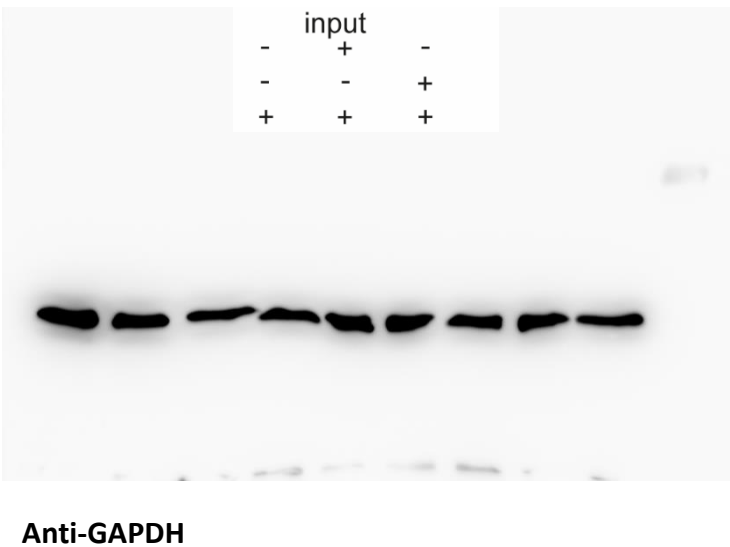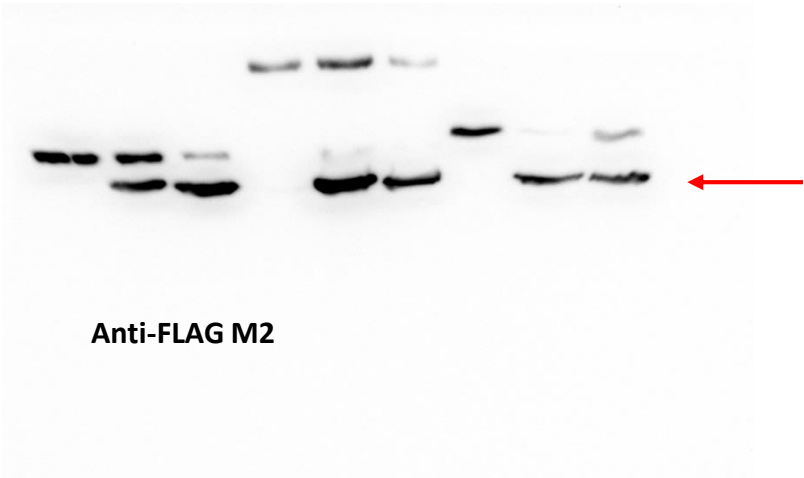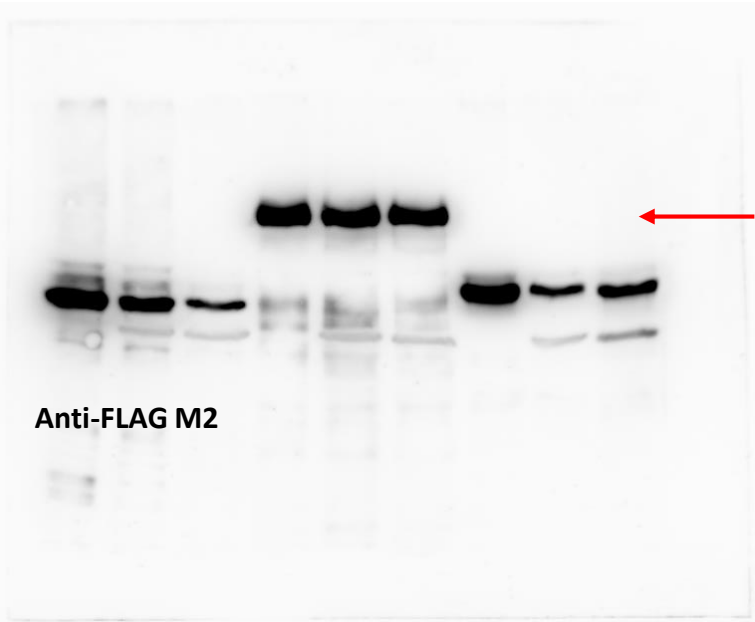

← Indicates correct band

Figure 3 C

|                          | Input |   |   |   | NiNTA-PD |   |   |   |
|--------------------------|-------|---|---|---|----------|---|---|---|
| FLAG-GMPPB               | +     | - | + | + | +        | - | + | + |
| His <sub>6</sub> -Ubi WT | -     | + | + | + | -        | + | + | + |
| KD TRIM67                | -     | - | - | + | -        | - | - | + |

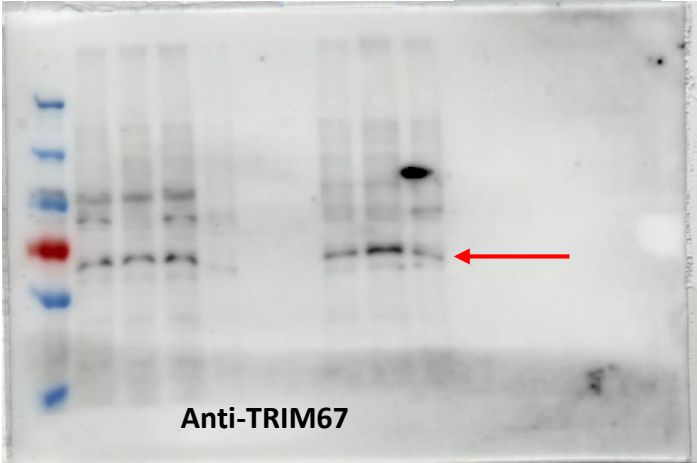

|                          | Input |   |   |   | NiNTA-PD |   |   |   |
|--------------------------|-------|---|---|---|----------|---|---|---|
| FLAG-GMPPB               | +     | - | + | + | +        | - | + | + |
| His <sub>6</sub> -Ubi WT | -     | + | + | + | -        | + | + | + |
| KD TRIM67                | -     | - | - | + | -        | - | - | + |

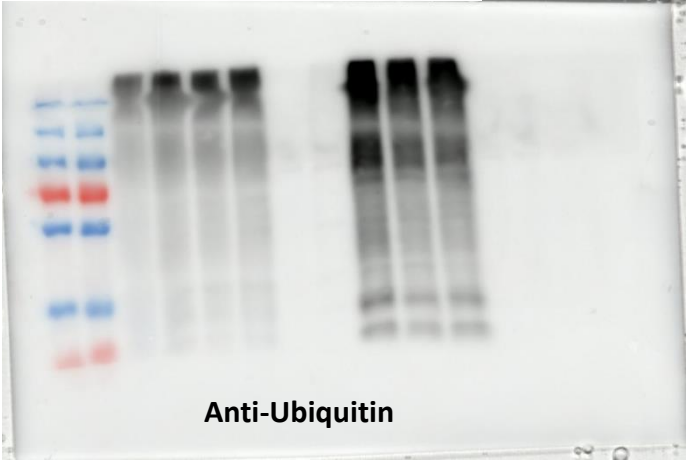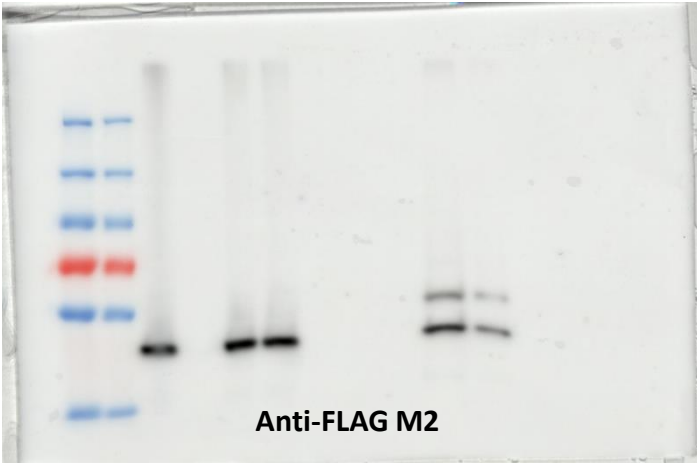

← Indicates correct band



Figure 4

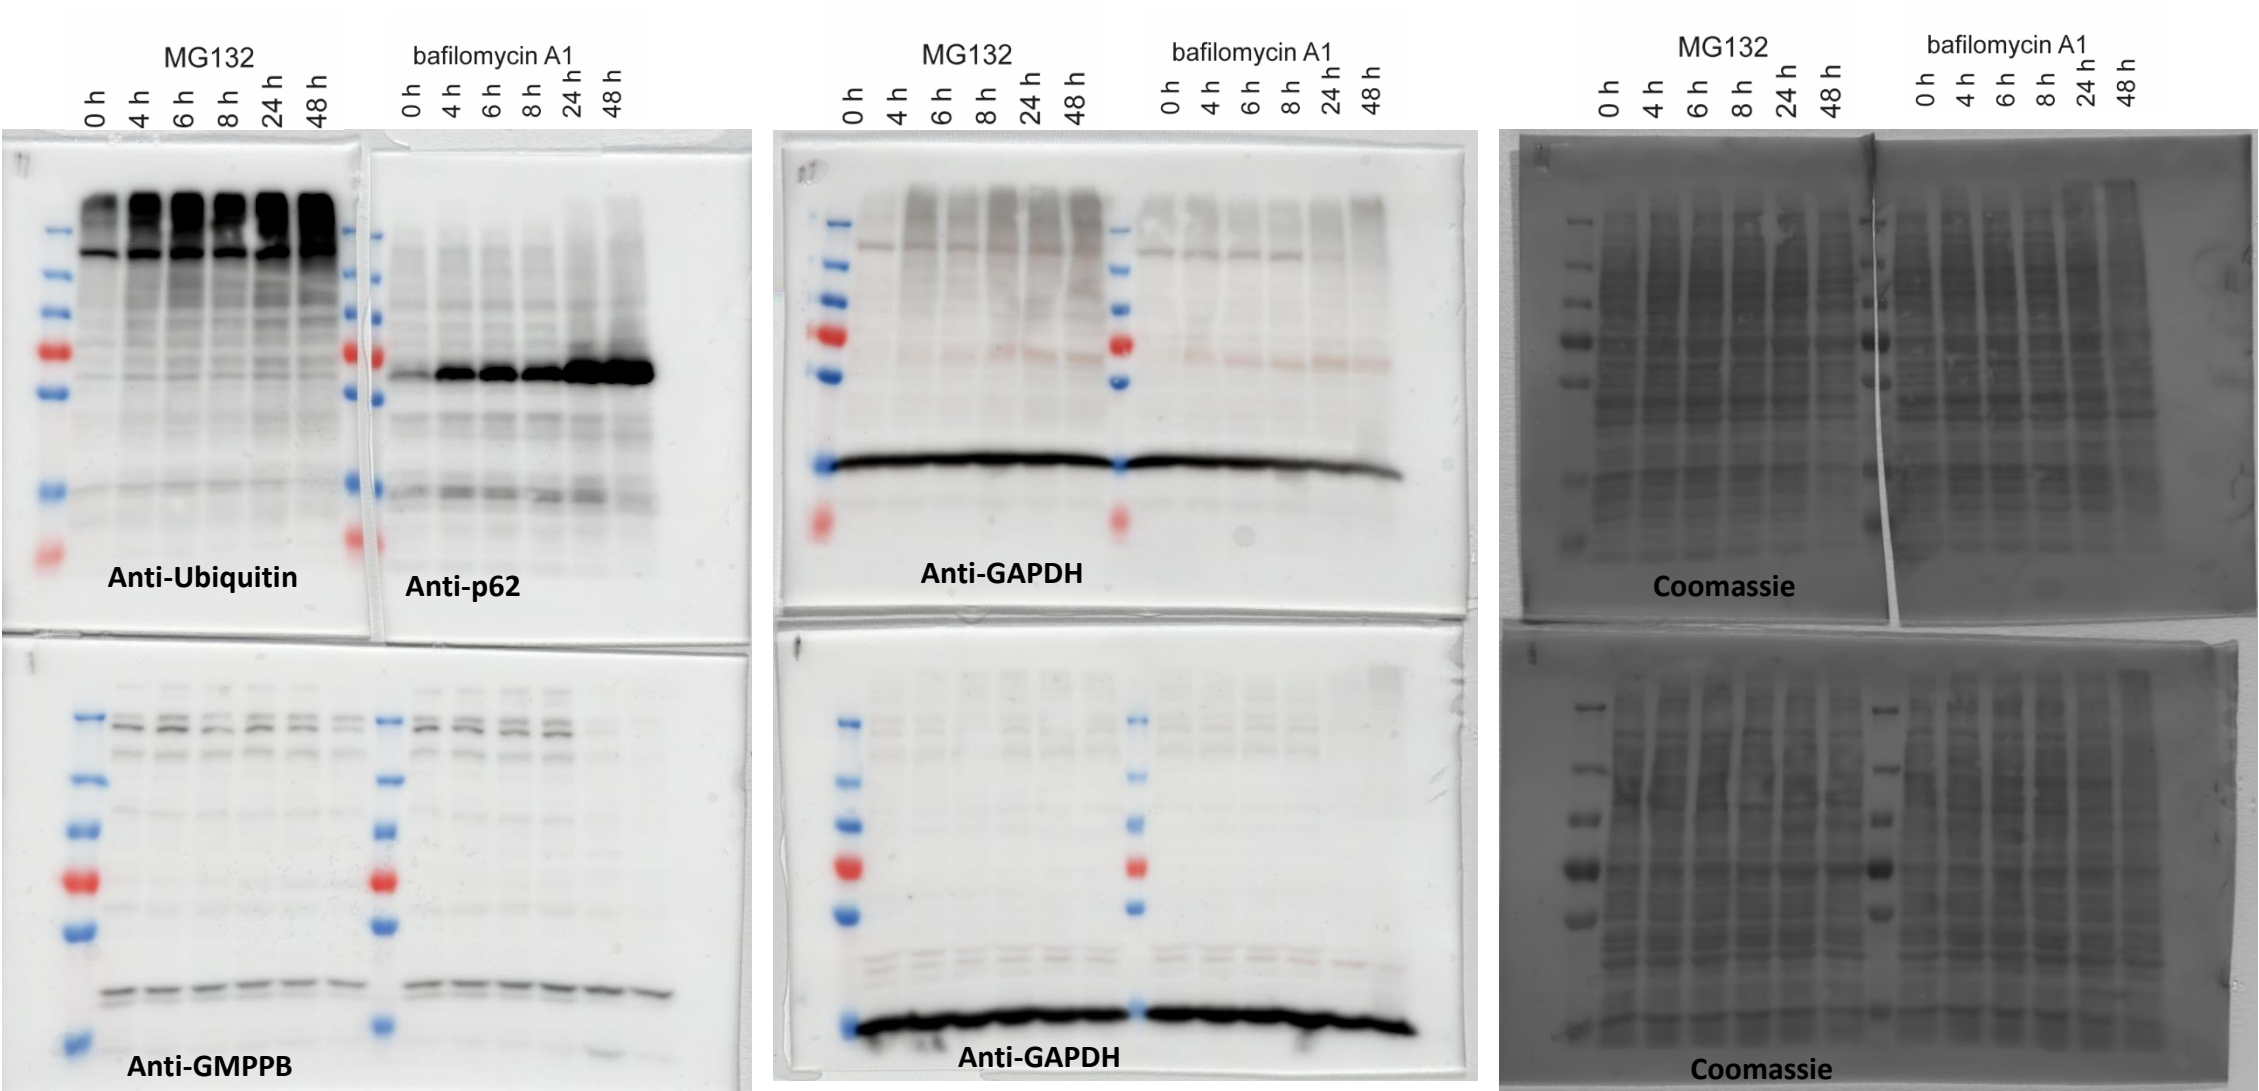

Figure 5

|                  | Myc-IP |   |   |   |   |   |   |   |
|------------------|--------|---|---|---|---|---|---|---|
| Myc-GMPPA WT     | +      | - | - | - | - | + | + | + |
| FLAG-GMPPB WT    | -      | + | - | - | - | + | - | - |
| FLAG-GMPPB D334N | -      | - | + | - | - | - | + | - |
| FLAG-GMPPB 3KR   | -      | - | - | + | - | - | - | + |
| HA -Ubi WT       | -      | - | - | - | + | + | + | + |

| input |   |   |   |   |   |   |   |
|-------|---|---|---|---|---|---|---|
| +     | - | - | - | - | + | + | + |
| -     | + | - | - | - | + | - | - |
| -     | - | + | - | - | - | + | - |
| -     | - | - | + | - | - | - | + |
| -     | - | - | - | + | + | + | + |

|                  | Myc-IP |   |   |   |   |   |   |   |
|------------------|--------|---|---|---|---|---|---|---|
| Myc-GMPPA WT     | +      | - | - | - | - | + | + | + |
| FLAG-GMPPB WT    | -      | + | - | - | - | + | - | - |
| FLAG-GMPPB D334N | -      | - | + | - | - | - | + | - |
| FLAG-GMPPB 3KR   | -      | - | - | + | - | - | - | + |
| HA -Ubi WT       | -      | - | - | - | + | + | + | + |

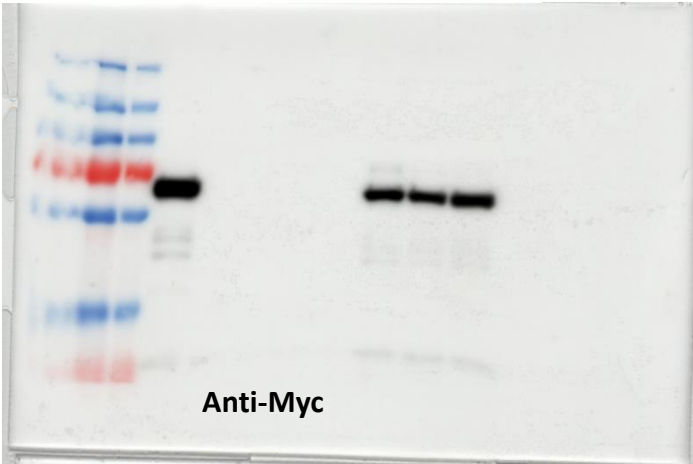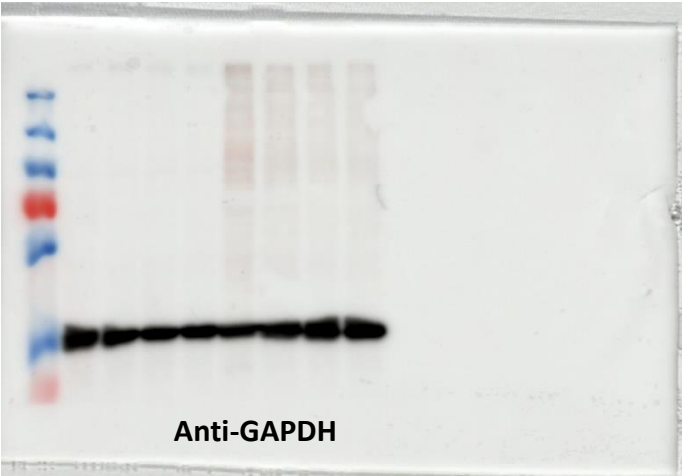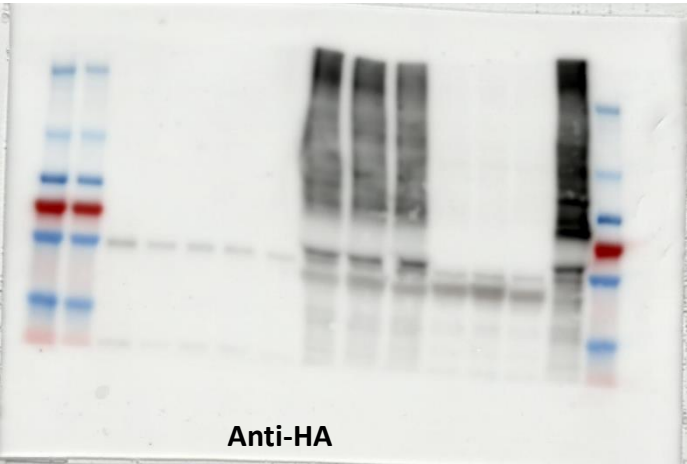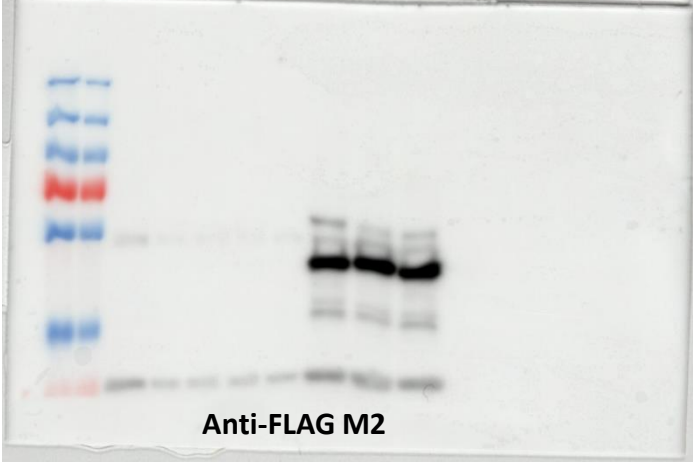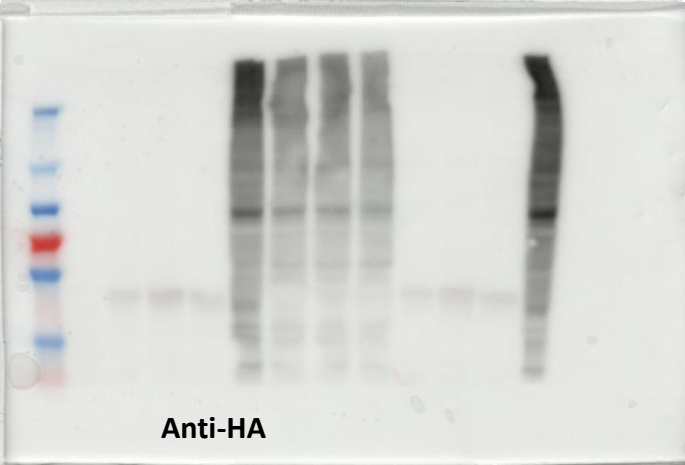



Supplementary Figure 2 A

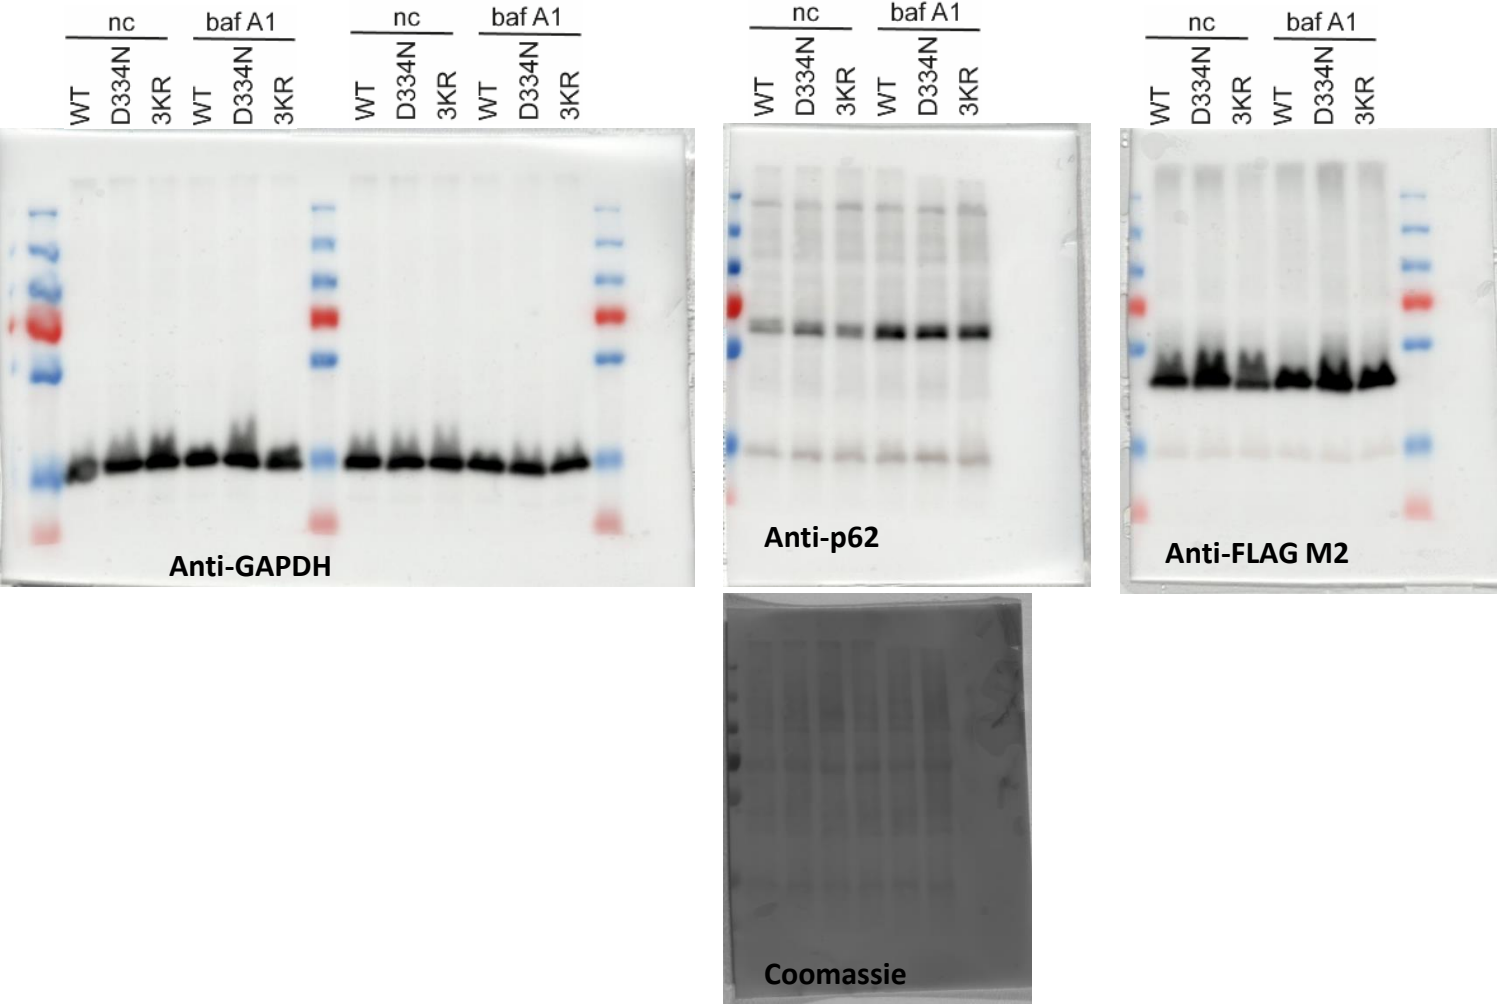

Supplementary Figure 2 B

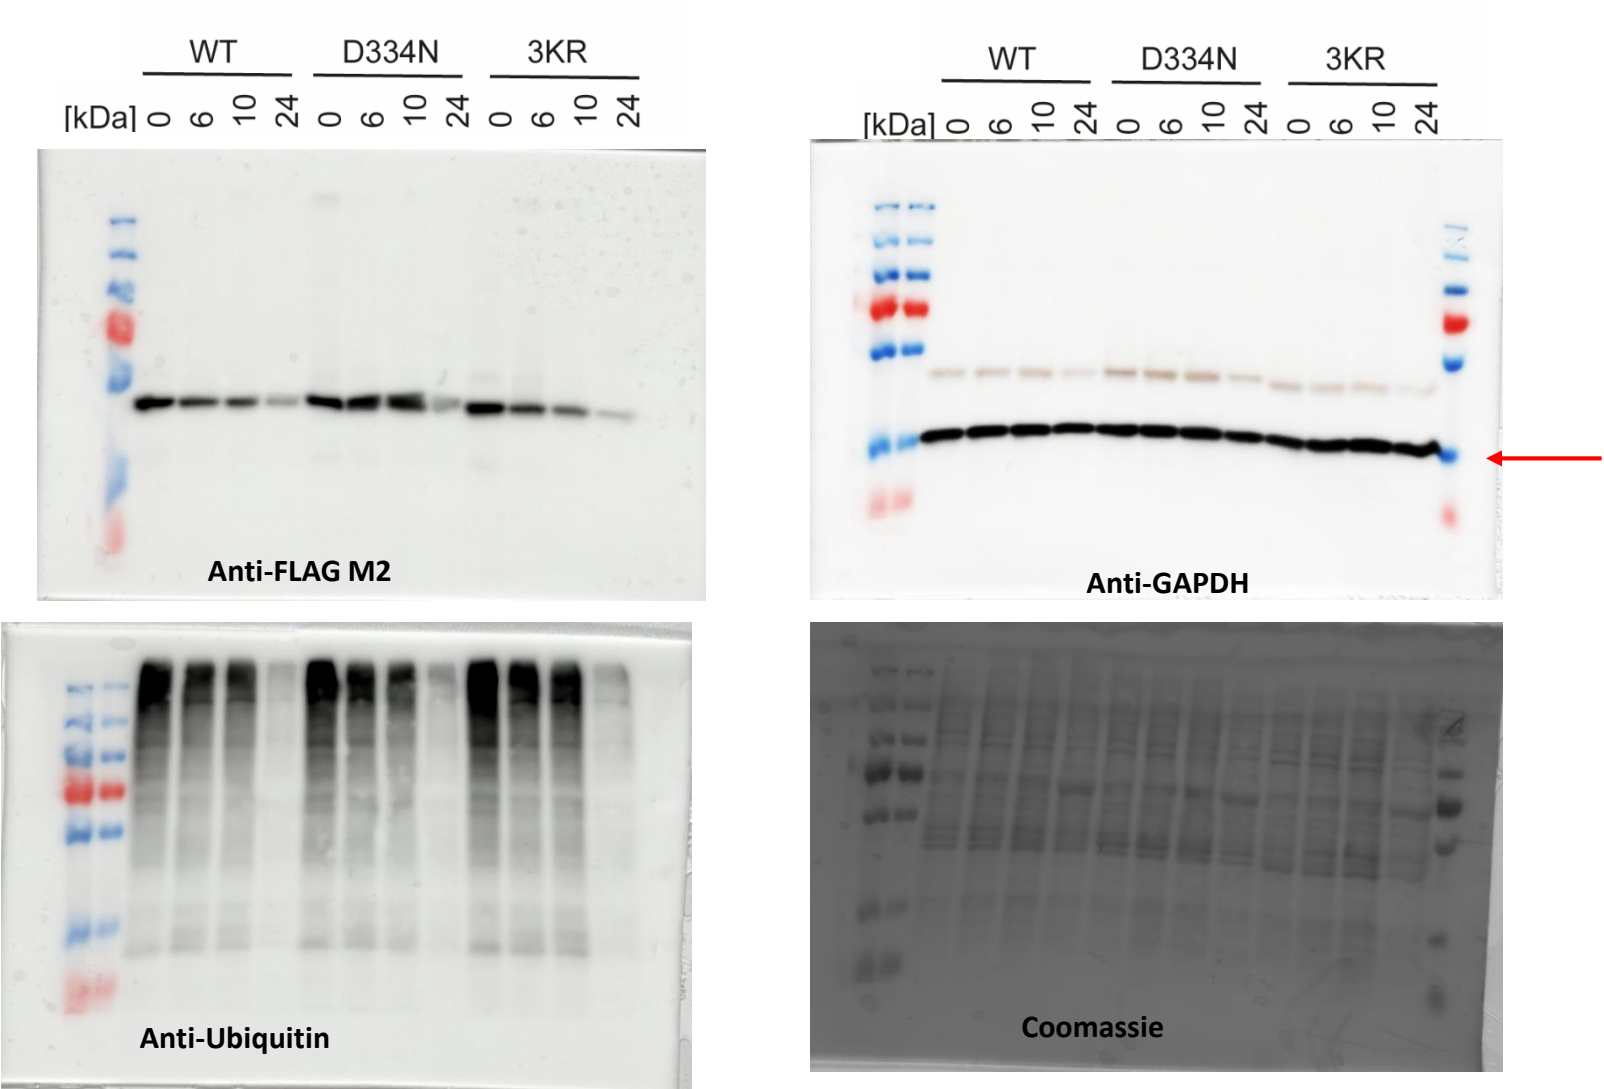

← Indicates correct band

Supplementary Figure 3 A

**A**

|                  | Myc-IP |   |   |   |   |   |   |   |   |   |   |
|------------------|--------|---|---|---|---|---|---|---|---|---|---|
| Myc-GMPPA WT     | +      | - | - | - | - | + | + | + | + | + | + |
| FLAG-GMPPB WT    | -      | + | - | - | - | + | - | - | + | - | - |
| FLAG-GMPPB D334N | -      | - | + | - | - | - | + | - | - | + | - |
| FLAG-GMPPB 3KR   | -      | - | - | + | - | - | - | + | - | - | + |
| HA -Ubi WT       | -      | - | - | - | + | + | + | + | - | - | + |

| input |   |   |   |   |   |   |   |   |   |   |   |
|-------|---|---|---|---|---|---|---|---|---|---|---|
| +     | - | - | - | - | + | + | + | + | + | + | + |
| -     | + | - | - | - | + | - | - | + | - | - | - |
| -     | - | + | - | - | - | + | - | - | + | - | - |
| -     | - | - | + | - | - | - | + | - | - | + | - |
| -     | - | - | - | + | + | + | + | - | - | - | + |

| input |   |   |   |   |   |   |   |   |   |   |   |
|-------|---|---|---|---|---|---|---|---|---|---|---|
| +     | - | - | - | - | + | + | + | + | + | + | + |
| -     | + | - | - | - | + | - | - | + | - | - | - |
| -     | - | + | - | - | - | + | - | - | + | - | - |
| -     | - | - | + | - | - | - | + | - | - | + | - |
| -     | - | - | - | + | + | + | + | - | - | - | + |

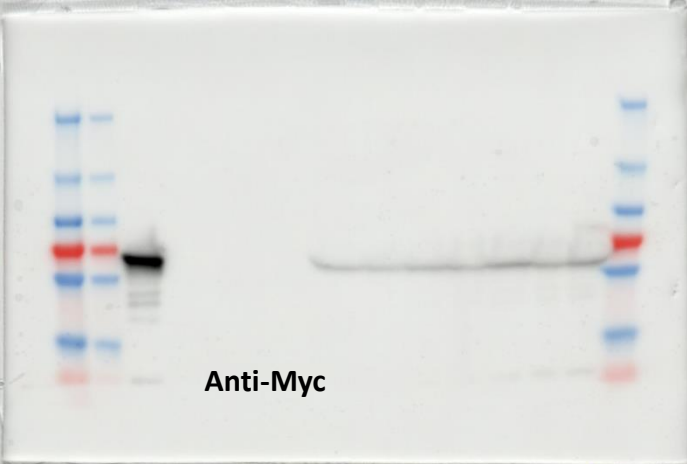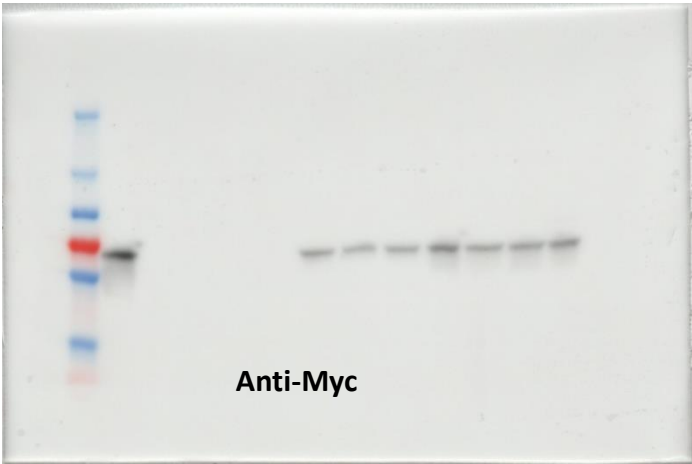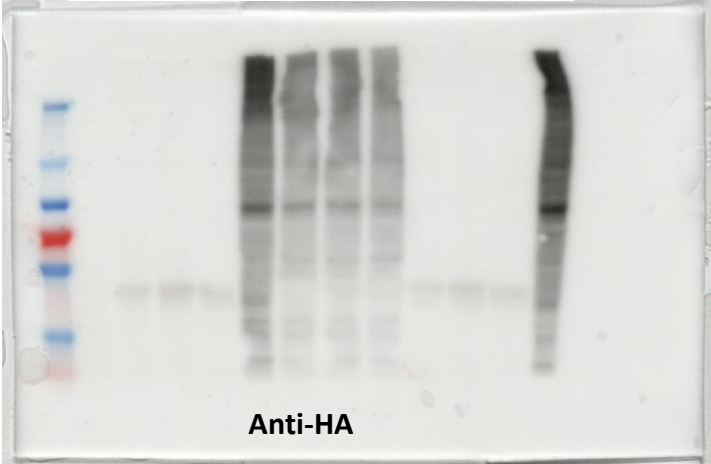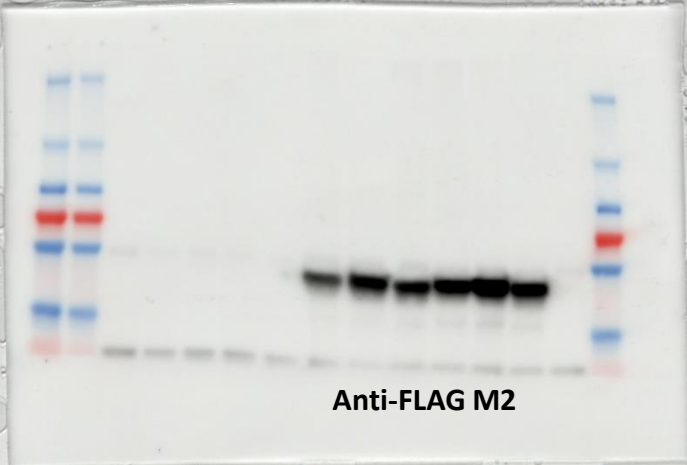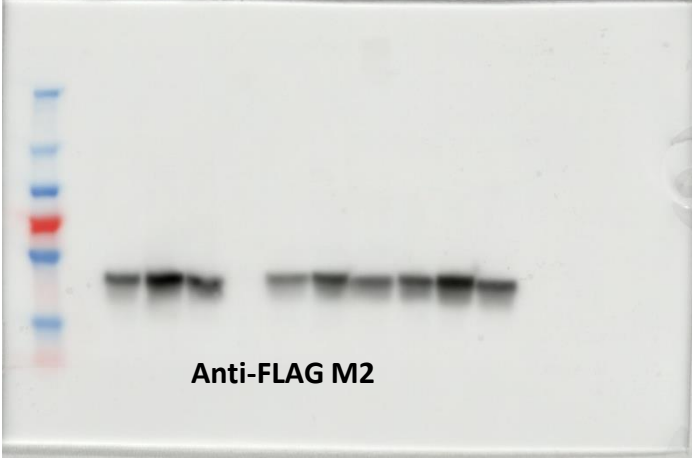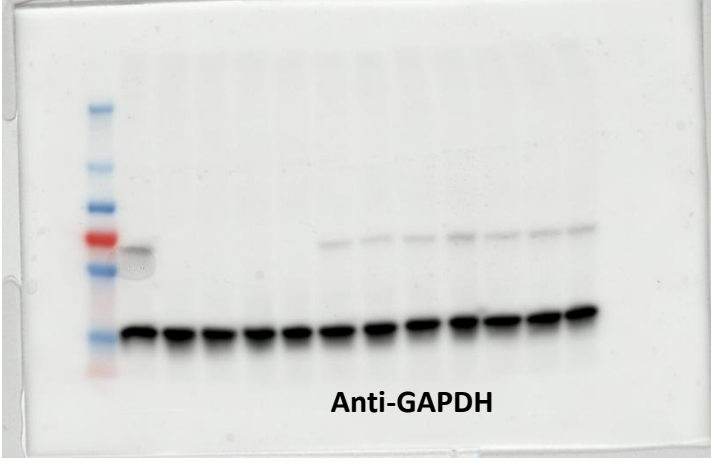

Supplementary Figure 3 A

**A**

|                  | Myc-IP |   |   |   |   |   |   |   |   |   |   |   |
|------------------|--------|---|---|---|---|---|---|---|---|---|---|---|
| Myc-GMPPA WT     | +      | - | - | - | - | + | + | + | + | + | + | + |
| FLAG-GMPPB WT    | -      | + | - | - | - | + | - | - | + | - | - | - |
| FLAG-GMPPB D334N | -      | - | + | - | - | - | + | - | - | + | - | - |
| FLAG-GMPPB 3KR   | -      | - | - | + | - | - | - | + | - | - | + | - |
| HA -Ubi WT       | -      | - | - | - | + | + | + | + | - | - | - | + |

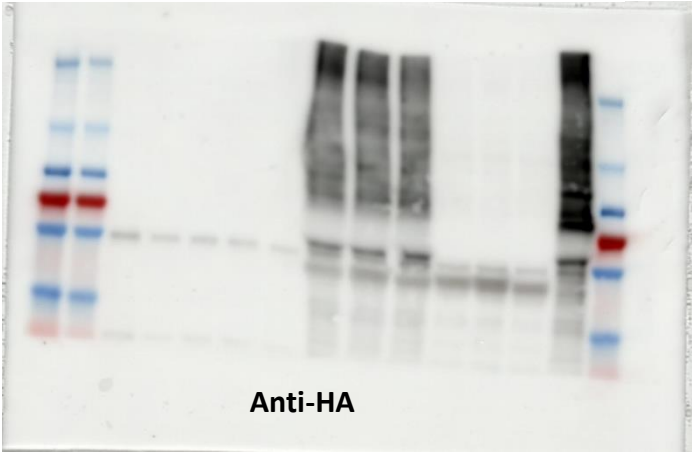

Supplementary Figure 3 B

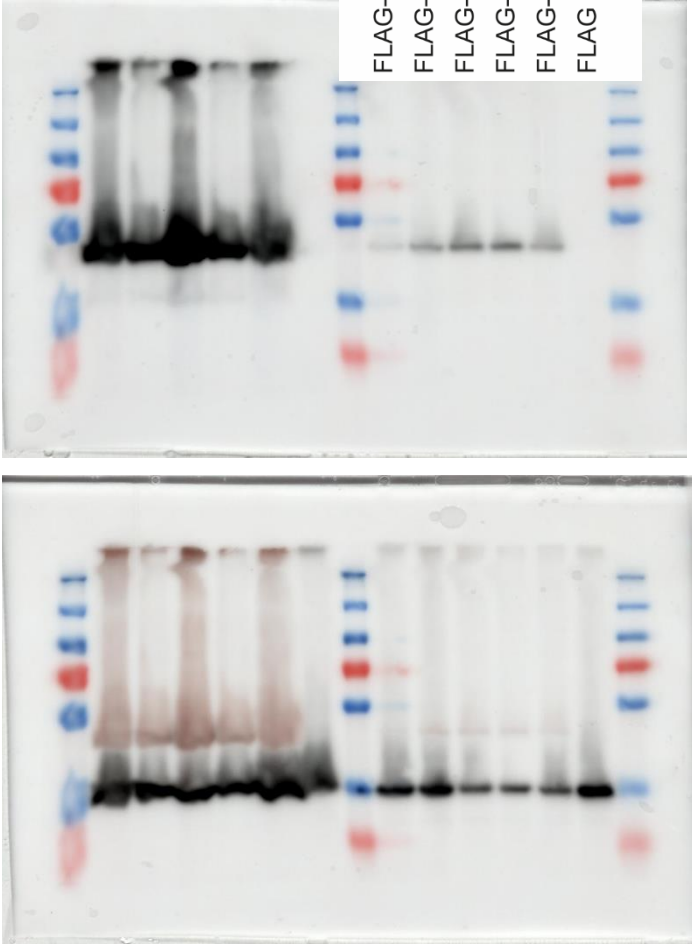

14.03.2024

1. Aufreinigung Bakterienlysats 12.03.2024 (1)
2. Aufreinigung Bakterienlysats 13.03.2024 (2)
3. Aufreinigung Bakterienlysats 13.03.2024 (3)

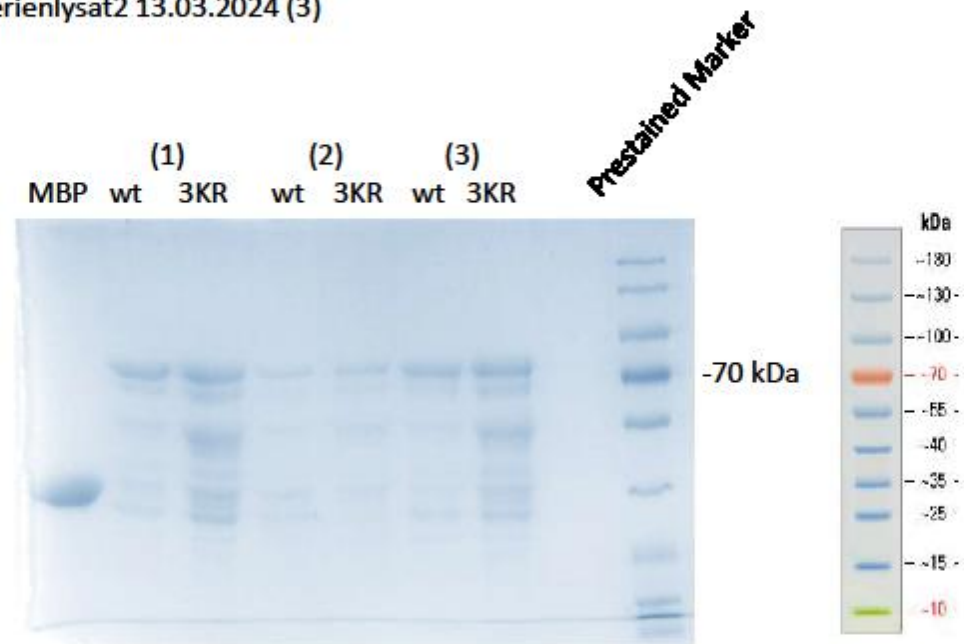

Supplement: Data_Sheet_2.pdf [file Data_Sheet_2.pdf]
